# Supplementary material for: Benchmarking ensemble streamflow prediction skill in the UK
Source: Copernicus journal article supplement (doi:10.5194/hess-22-2023-2018), 2018-03-29
Supplement: Supplementary file 1 [file hess-22-2023-2018-supplement.zip]

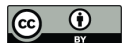

## *Supplement of*

# **Benchmarking ensemble streamflow prediction skill in the UK**

**Shaun Harrigan et al.**

*Correspondence to:* Shaun Harrigan ([shaun.harrigan@ecmwf.int](mailto:shaun.harrigan@ecmwf.int))

- [hess-22-2023-2018-supplement-title-page.pdf](#)
- [Supplementary\\_Information](#)
  - [Supplementary\\_Figures.pdf](#)
  - [Supplementary\\_Table\\_S1.csv](#)

The copyright of individual parts of the supplement might differ from the CC BY 4.0 License.
